# Supplementary material for: Photocyclizable resorcin[4]arene dimers
Source: Royal Society of Chemistry journal article supplement (doi:10.1039/b807700b), 2008-11-26
Supplement: b807700b.pdf [file b807700b.pdf]

## Photoswitchable resorcin[4]arene dimers

Christian Schäfer, Frank Strübe, Sebastian Bringmann and Jochen Mattay\*

### Supplementary Materials

|                                               |    |
|-----------------------------------------------|----|
| UV/VIS spectrum of <b>1</b> .....             | S1 |
| UV/VIS spectrum of <b>2</b> .....             | S2 |
| <sup>1</sup> H NMR spectrum of <b>1</b> ..... | S3 |

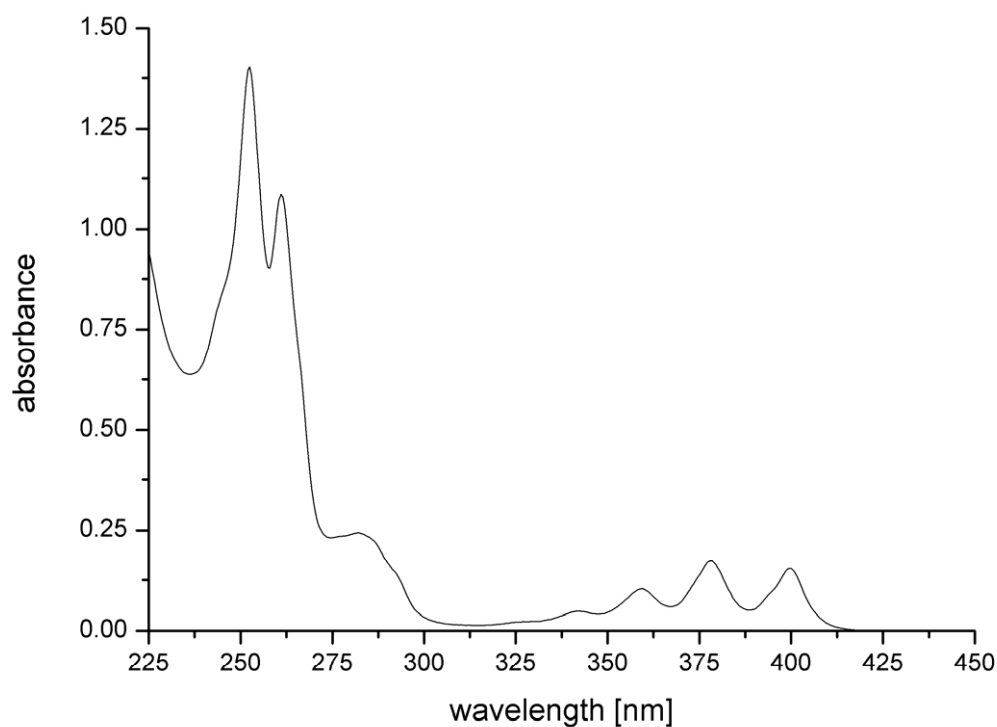

**Fig. S1** UV/VIS spectrum of **1** in cyclohexane ( $1.04 \times 10^{-5}$  mol/L).

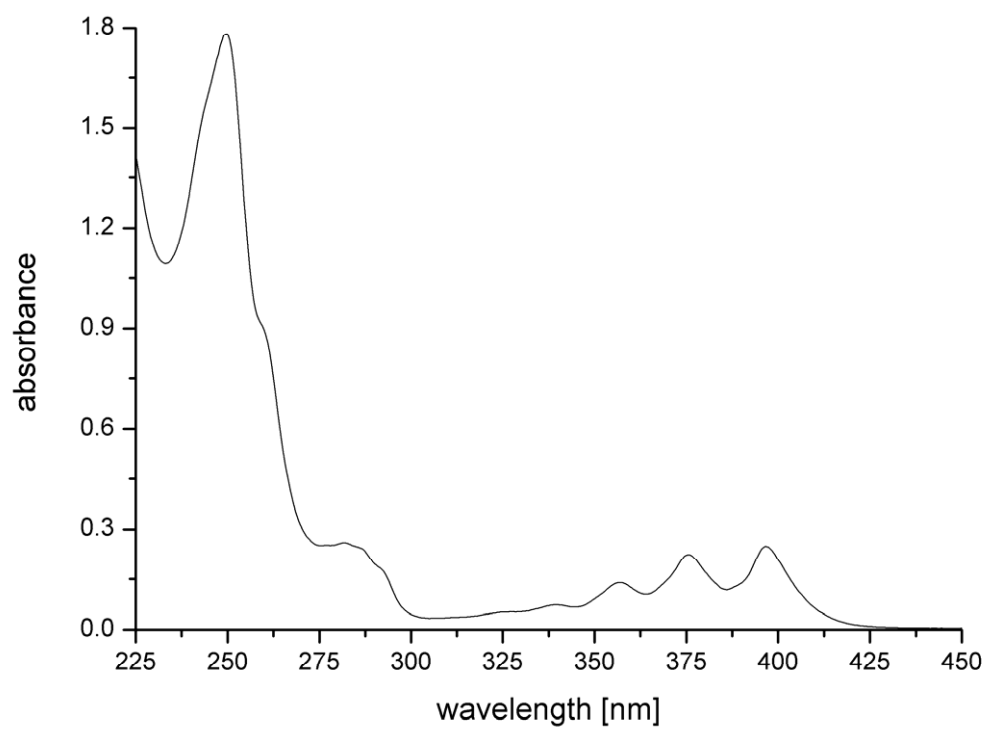

**Fig. S2** UV/VIS spectrum of **2** in cyclohexane ( $1.15 \times 10^{-5}$  mol/L).

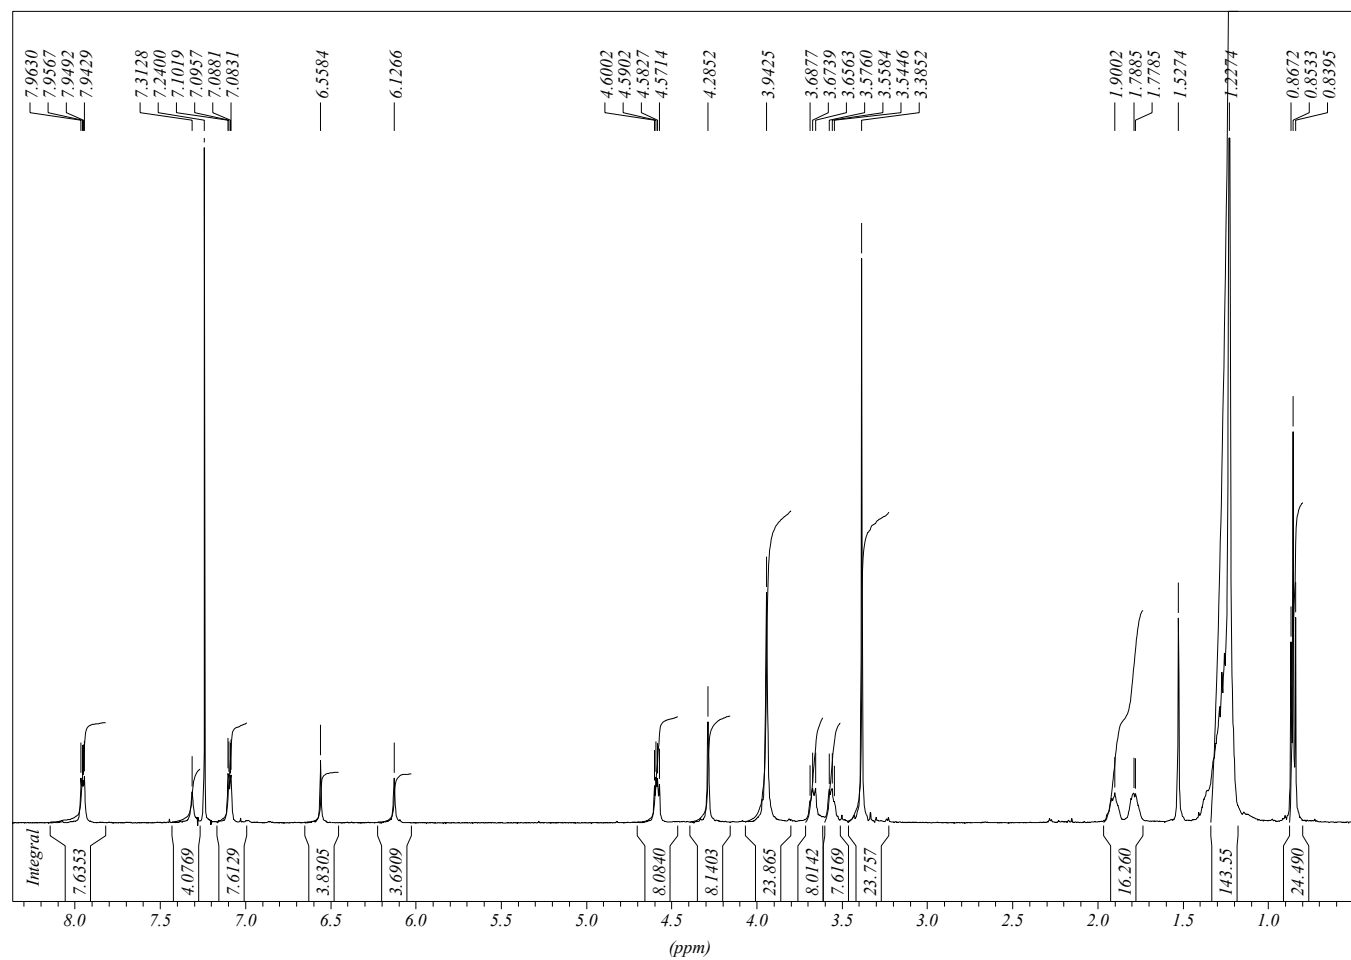

**Fig. S3** 500 MHz <sup>1</sup>H NMR spectrum of **1** in CDCl<sub>3</sub> (7.24 ppm).
